# Supplementary material for: Droplet-based microfluidic platform for heterogeneous enzymatic assays
Source: Royal Society of Chemistry journal article supplement (doi:10.1039/c3lc41418c), 2013-01-01

Figure S1: Workflow for determination of sugar released from biomass using conventional, microscale and microfluidic approaches.

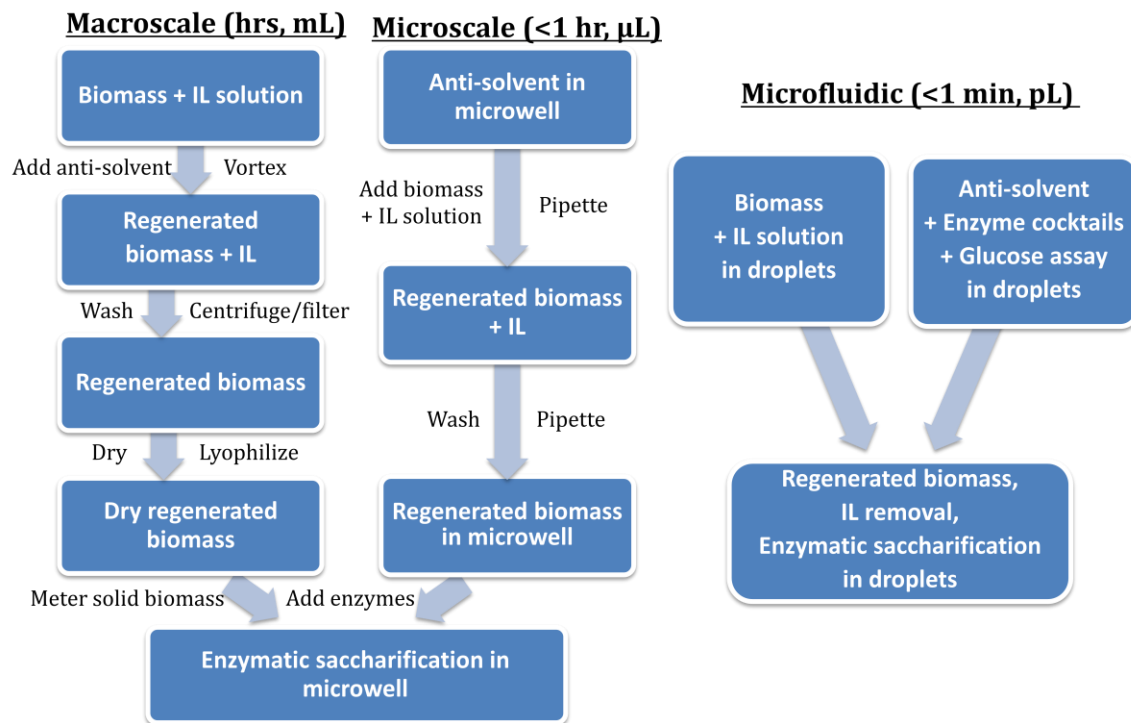

Figure S2: SEM images of the lyophilized microscale regenerated biomass particles. (A) and (B) Porous internal structure of *Avicel* (C) and (D) Layered internal structure of switchgrass particle.

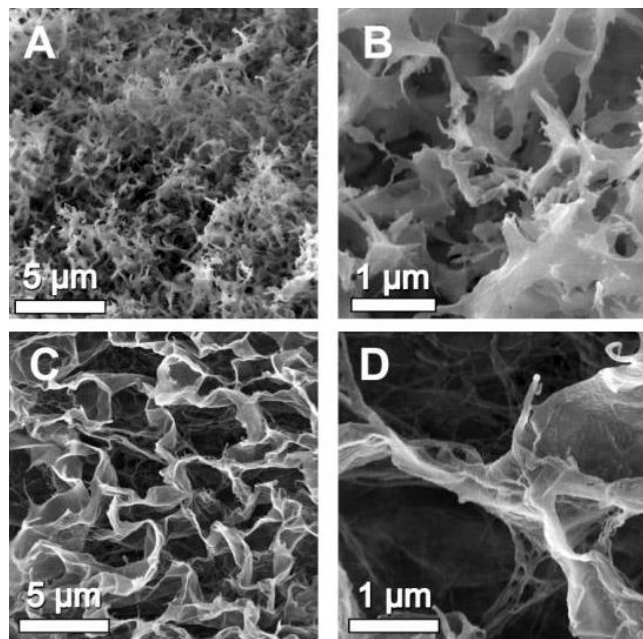

Supplement: c3lc41418c.pdf [file c3lc41418c.pdf]
